# Supplementary material
Source: PubMed Central journal article supplement (PMC9213621)
Supplement: 11357_2022_576_MOESM1_ESM.pdf [file 11357_2022_576_MOESM1_ESM.pdf]

## Supplementary Figure 1

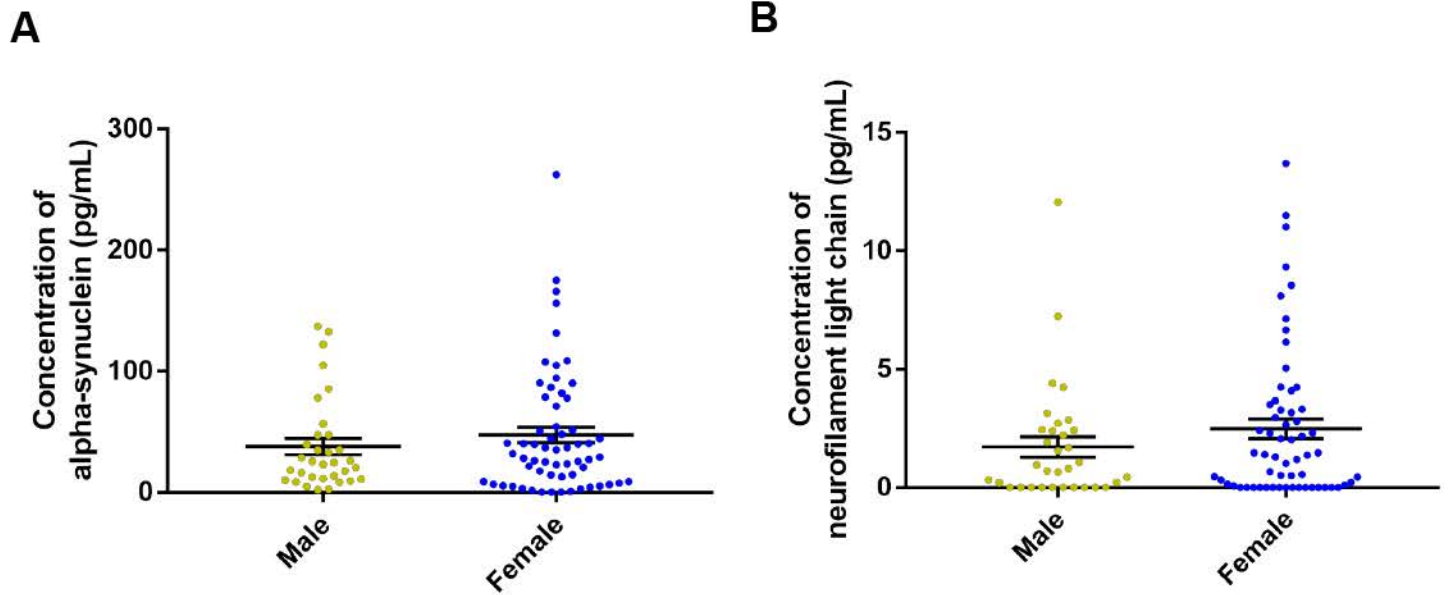

Supplementary Fig. 1 Expression levels of a-synuclein and NfL in tear fluids in participants of different sex. The scatterplots display data density and means with standard deviations of tear fluid levels of a-synuclein (a), and NfL (b) in male and female participants.

## Supplementary Figure 2

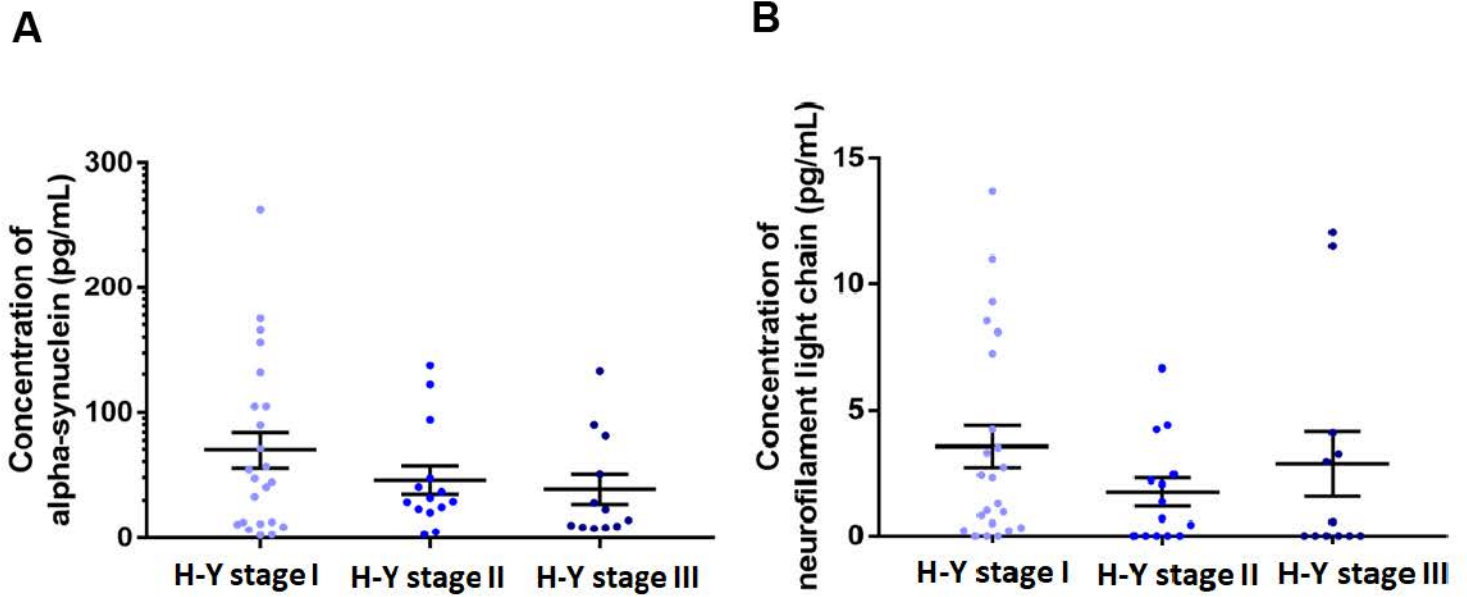

Supplementary Fig. 2 Expression levels of  $\alpha$ -synuclein and NfL in tear fluids in PD patients in different Hoehn-Yahr stages. The scatterplots display data density and means with standard deviations of tear fluid levels of  $\alpha$ -synuclein (a), and NfL (b) in PD patients in different Hoehn-Yahr stages.
